# Supplementary material
Source: publisher figshare collection journal article supplement (https://acs.figshare.com/ndownloader/files/4045318)
Supplement: Supplementary file 1 [file 4045318]

# **Modified Graphene/Polyimide Nanocomposites: Reinforcing and Tribological Effects**

Ting Huang<sup>a</sup>, Yuanshi Xin<sup>a</sup>, Tongsheng Li<sup>a\*</sup>, Steven Nutt<sup>b</sup>, Chao Su<sup>a</sup>, Haiming Chen<sup>a</sup>,  
Pei Liu<sup>a</sup> and Zuliang Lai<sup>a</sup>

<sup>a</sup>State Key Laboratory of Molecular Engineering of Polymers, Department of Macromolecular Science, Fudan University, Shanghai, 200433, P. R. China and <sup>b</sup>Department of Chemical Engineering and Materials Science, University of Southern California, Los Angeles, CA, 90089-0241, United States

## **Supporting Information**

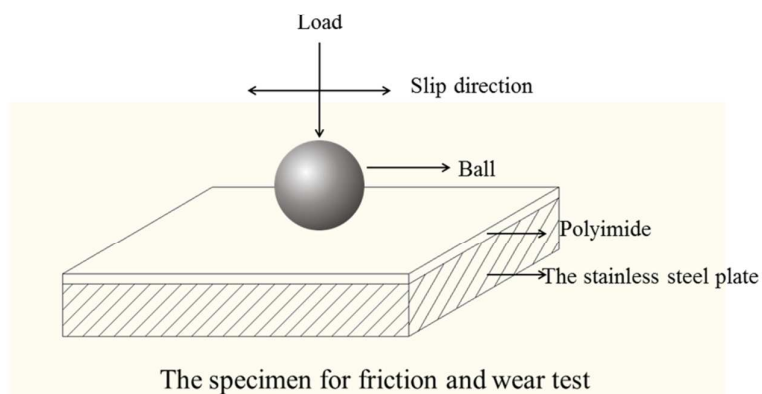

**Figure S1.** Schematic diagram of the contact configuration of the reciprocating friction and wear testing machine.

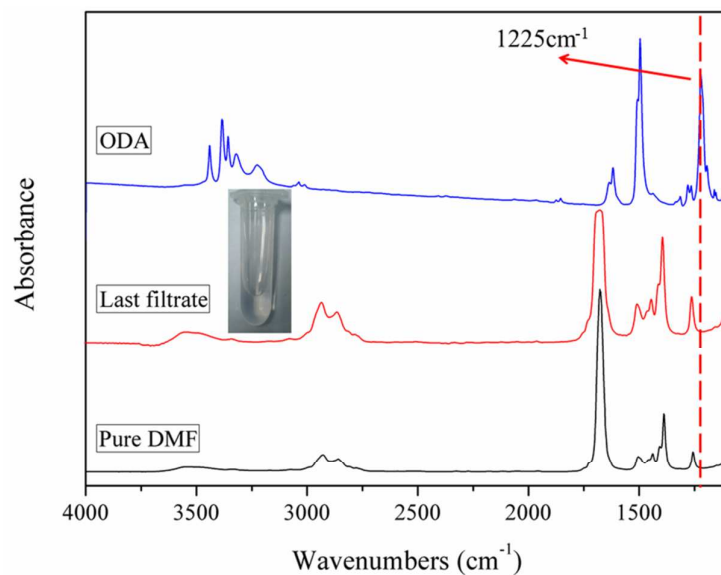

**Figure S2.** FTIR spectra of ODA, last filtrate and pure DMF, as well as typical photograph of the last filtrate (inset), respectively.

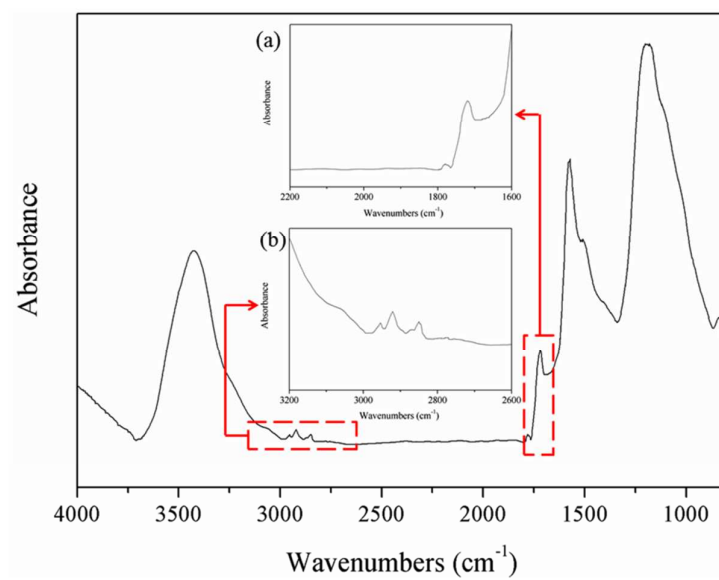

**Figure S3.** FTIR spectra of MG-BPADA after thermal imidization.

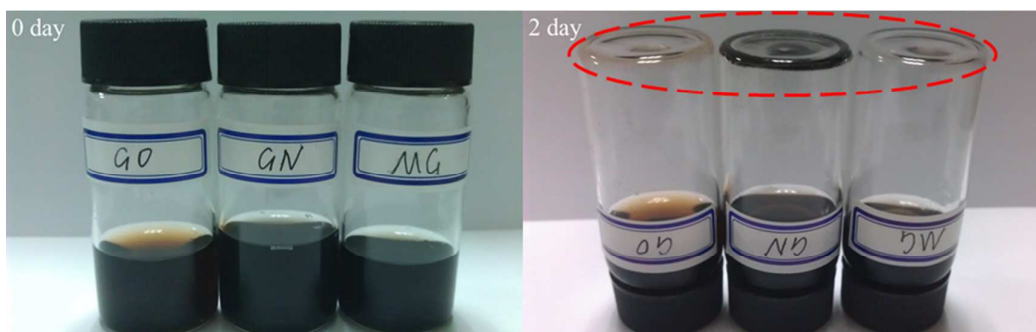

**Figure S4.** The dispersibility and time-dependent stability of GO, GN and MG in DMF solvent.

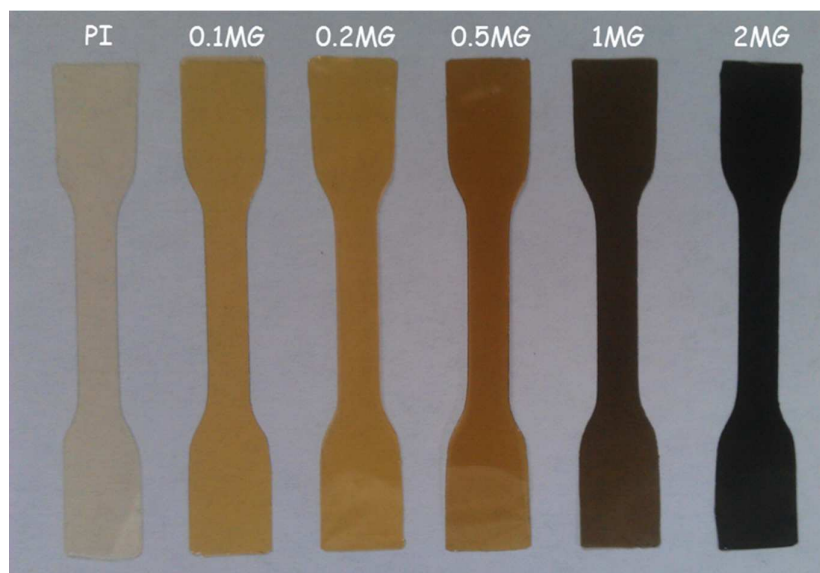

**Figure S5.** Appearance for dog-bone type specimens of neat PI and MG/PI nanocomposite films

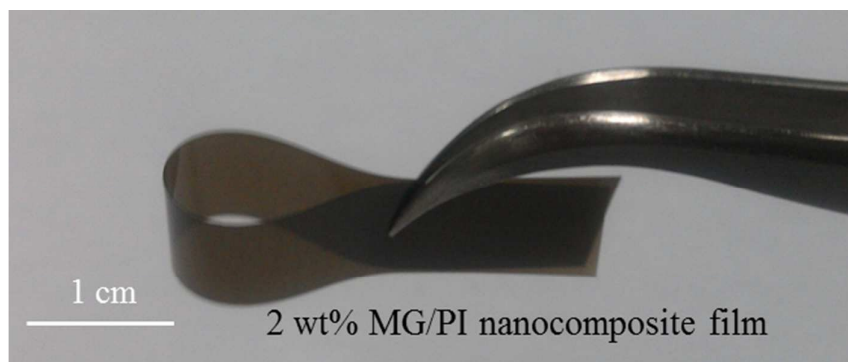

**Figure S6.** A typical figure shows high flexibility of 2 wt% MG/PI nanocomposite film.

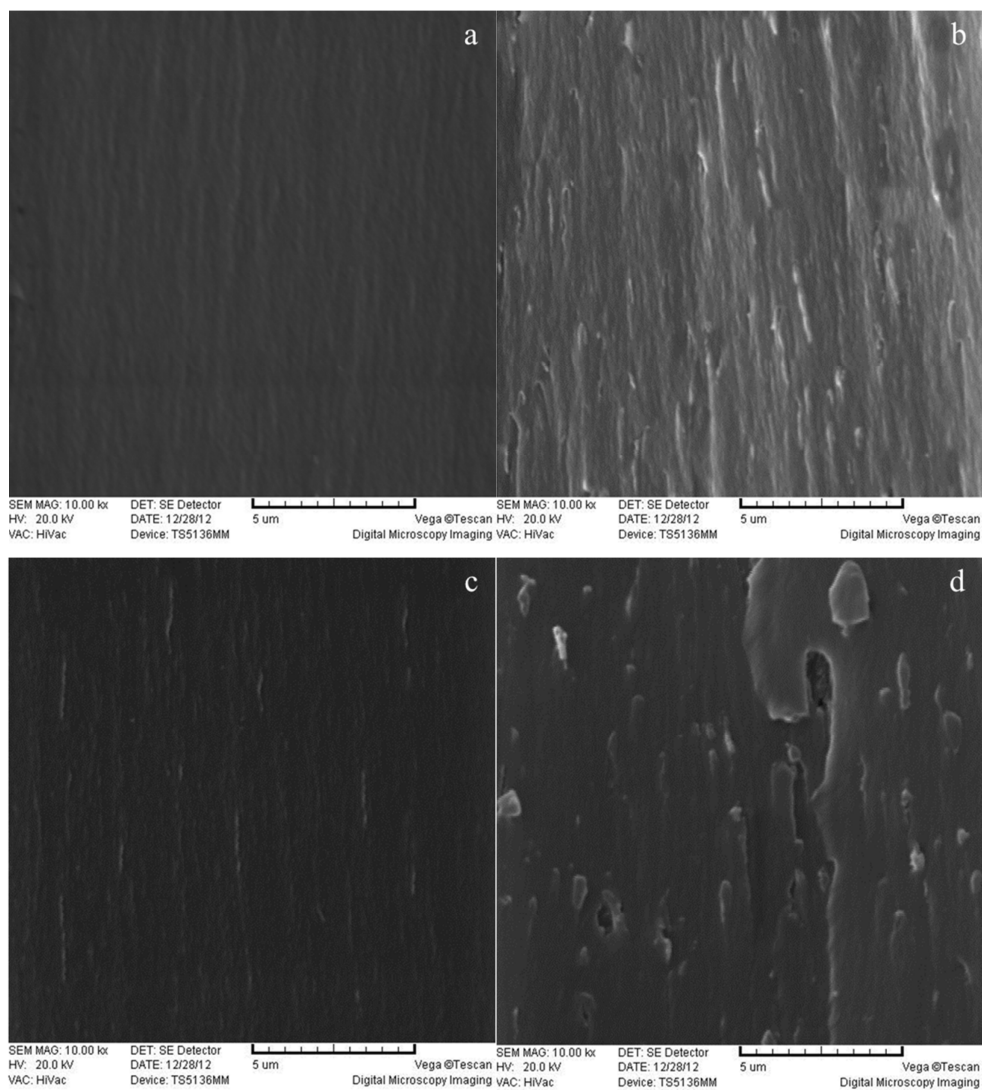

**Figure S7.** SEM images of fracture surfaces of (a) neat PI, (b) 2 wt% MG/PI, (c) 1 wt% MG/PI and (d) 1 wt% GN/PI specimens (magnification: 1000).

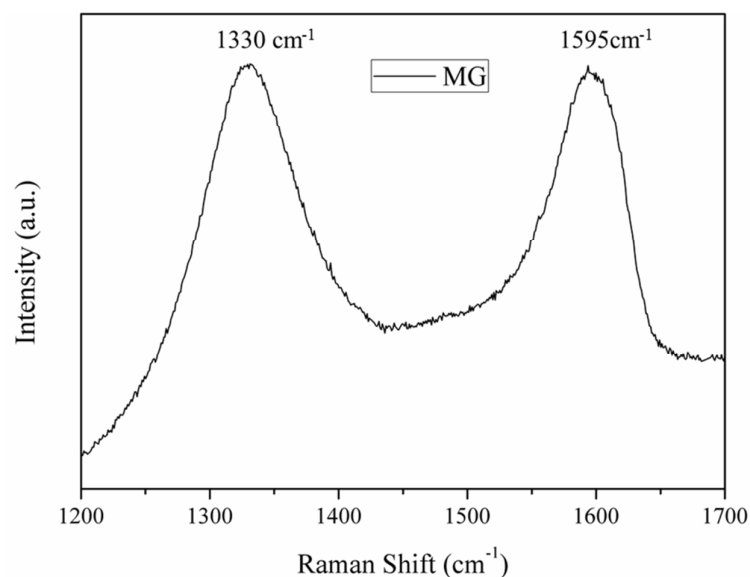

**Figure S8.** Raman spectrum of MG.

**Table S1. Data based on properties of all the MG/PI specimens**

| Specimens                                      | 0.1 wt%<br>MG/PI        | 0.2 wt%<br>MG/PI        | 0.5 wt%<br>MG/PI        | 1 wt%<br>MG/PI          | 2 wt%<br>MG/PI          |
|------------------------------------------------|-------------------------|-------------------------|-------------------------|-------------------------|-------------------------|
| Tensile strength (MPa)                         | 92                      | 97                      | 107                     | 115                     | 120                     |
| Young's modulus (GPa)                          | 1.72                    | 1.78                    | 1.92                    | 2.14                    | 2.32                    |
| Elongation at break (%)                        | 21.56                   | 19.79                   | 16.90                   | 16.67                   | 15.67                   |
| T <sub>g</sub> (°C)                            | 225                     | 229                     | 232                     | 237                     | 240                     |
| Microhardness (MPa)                            | 397                     | 478                     | 532                     | 586                     | 607                     |
| T <sub>5</sub> <sup>a</sup> (°C)               | 548                     | 553                     | 564                     | 567                     | 569                     |
| Electrical conductivity<br>(Sm <sup>-1</sup> ) | 8.6 × 10 <sup>-10</sup> | 3.6 × 10 <sup>-7</sup>  | 3.1 × 10 <sup>-4</sup>  | 2.6 × 10 <sup>-3</sup>  | 8.9 × 10 <sup>-3</sup>  |
| Friction coefficient                           | 0.398                   | 0.389                   | 0.377                   | 0.365                   | 0.360                   |
| Wear rate (mm <sup>3</sup> /Nm)                | 8.42 × 10 <sup>-5</sup> | 6.98 × 10 <sup>-5</sup> | 3.89 × 10 <sup>-5</sup> | 1.54 × 10 <sup>-5</sup> | 0.66 × 10 <sup>-5</sup> |

<sup>a</sup>T<sub>5</sub>: the temperature at 5 wt% of weight loss was recorded by TGA with a heating of 20 °C/min under N<sub>2</sub> atmosphere.
